# Supplementary material for: Acute-Phase Initiation of Cardiac Rehabilitation for Short-Term Improvement in Activities of Daily Living in Patients Hospitalized for Acute Heart Failure
Source: MDPI journal article supplement (doi:10.3390/jcdd9040097), 2022-03-25
Supplement: s1 [file s1]

**Supplemental Table S1:** Characteristics of patients with and without early rehabilitation (within 2 days after hospital admission) before and after propensity score matching

|                                      | Before propensity score matching Rehabilitation within 2 days |                   | P-value | SMD    | After propensity score matching Rehabilitation within 2 days |                   | SMD    |
|--------------------------------------|---------------------------------------------------------------|-------------------|---------|--------|--------------------------------------------------------------|-------------------|--------|
|                                      | No<br>(n=261,398)                                             | Yes<br>(n=45,428) |         |        | No<br>(n=45,427)                                             | Yes<br>(n=45,427) |        |
| Age, years                           | 76 (±12)                                                      | 79 (±11)          | <0.001  | 0.250  | 79 (±11)                                                     | 79 (±11)          | 0.004  |
| Male sex                             | 146,421 (56.0)                                                | 23,077 (50.8)     | <0.001  | -0.105 | 23,113 (50.9)                                                | 23,077 (50.8)     | -0.002 |
| Body mass index (kg/m <sup>2</sup> ) |                                                               |                   | <0.001  |        |                                                              |                   |        |
| <18.5                                | 39,836 (15.2)                                                 | 8,187 (18.0)      |         | 0.075  | 8,243 (18.1)                                                 | 8,186 (18.0)      | -0.003 |
| 18.5–24.9                            | 153,886 (58.9)                                                | 26,814 (59.0)     |         | 0.003  | 26,723 (58.8)                                                | 26,814 (59.0)     | 0.004  |
| 25.0–29.9                            | 51,659 (19.8)                                                 | 7,955 (17.5)      |         | -0.058 | 7,912 (17.4)                                                 | 7,955 (17.5)      | 0.002  |
| ≥30.0                                | 16,017 (6.1)                                                  | 2,472 (5.4)       |         | -0.029 | 2,549 (5.6)                                                  | 2,472 (5.4)       | -0.007 |
| Comorbidity                          |                                                               |                   |         |        |                                                              |                   |        |
| Atrial fibrillation                  | 104,341 (39.9)                                                | 19,319 (42.5)     | <0.001  | 0.053  | 19,274 (42.4)                                                | 19,318 (42.5)     | 0.002  |
| Hypertension                         | 177,608 (67.9)                                                | 31,221 (68.7)     | <0.001  | 0.017  | 31,342 (69.0)                                                | 31,220 (68.7)     | -0.006 |
| Diabetes mellitus                    | 84,447 (32.3)                                                 | 14,196 (31.2)     | <0.001  | -0.023 | 14,246 (31.4)                                                | 14,196 (31.3)     | -0.002 |
| Chronic renal failure                | 38,621 (14.8)                                                 | 6,565 (14.5)      | 0.073   | -0.009 | 6,462 (14.2)                                                 | 6,565 (14.5)      | 0.006  |
| Chronic liver disease                | 10,892 (4.2)                                                  | 1,662 (3.7)       | <0.001  | -0.026 | 1,681 (3.7)                                                  | 1,662 (3.7)       | -0.002 |
| Chronic respiratory disease          | 29,509 (11.3)                                                 | 5,716 (12.6)      | <0.001  | 0.040  | 5,714 (12.6)                                                 | 5,715 (12.6)      | <0.001 |
| Anemia                               | 40,013 (15.3)                                                 | 7,558 (16.6)      | <0.001  | 0.036  | 7,478 (16.5)                                                 | 7,557 (16.6)      | 0.005  |
| Cancer                               | 15,886 (6.1)                                                  | 2,499 (5.5)       | <0.001  | -0.025 | 2,453 (5.4)                                                  | 2,499 (5.5)       | 0.004  |
| Myocardial infarction                | 6,605 (2.5)                                                   | 1,179 (2.6)       | 0.390   | 0.004  | 1,186 (2.6)                                                  | 1,179 (2.6)       | -0.001 |
| Dilated cardiomyopathy               | 22,399 (8.6)                                                  | 3,189 (7.0)       | <0.001  | -0.058 | 3,164 (7.0)                                                  | 3,189 (7.0)       | 0.002  |
| Smoking                              | 89,868 (34.4)                                                 | 14,677 (32.3)     | <0.001  | -0.044 | 14,824 (32.6)                                                | 14,677 (32.3)     | -0.007 |

|                                        |                |               |        |        |               |               |        |
|----------------------------------------|----------------|---------------|--------|--------|---------------|---------------|--------|
| Prior hospital admission               | 70,051 (26.8)  | 13,259 (29.2) | <0.001 | 0.053  | 13,355 (29.4) | 13,258 (29.2) | -0.005 |
| New York Heart Association             |                |               | 0.330  |        |               |               |        |
| Class II                               | 82,070 (31.4)  | 14,355 (31.6) |        | 0.004  | 14,271 (31.4) | 14,354 (31.6) | 0.004  |
| Class III                              | 101,906 (39.0) | 17,542 (38.6) |        | -0.008 | 17,601 (38.7) | 17,542 (38.6) | -0.003 |
| Class IV                               | 77,422 (29.6)  | 13,531 (29.8) |        | 0.004  | 13,555 (29.8) | 13,531 (29.8) | -0.001 |
| Total Barthel Index score at admission | 62 (±39)       | 54 (±39)      | <0.001 | -0.188 | 54 (±39)      | 54 (±39)      | 0.001  |
| Barthel index: Bowels                  |                |               | <0.001 |        |               |               |        |
| 0                                      | 63,153 (24.2)  | 13,350 (29.4) |        | 0.118  | 13,502 (29.7) | 13,350 (29.4) | -0.007 |
| 5                                      | 34,127 (13.1)  | 6,972 (15.3)  |        | 0.066  | 6,754 (14.9)  | 6,971 (15.3)  | 0.013  |
| 10                                     | 164,118 (62.8) | 25,106 (55.3) |        | -0.153 | 25,171 (55.4) | 25,106 (55.3) | -0.003 |
| Barthel index: Bladder                 |                |               | <0.001 |        |               |               |        |
| 0                                      | 66,981 (25.6)  | 14,091 (31.0) |        | 0.120  | 14,196 (31.3) | 14,091 (31.0) | -0.005 |
| 5                                      | 33,529 (12.8)  | 6,834 (15.0)  |        | 0.064  | 6,648 (14.6)  | 6,833 (15.0)  | 0.011  |
| 10                                     | 160,888 (61.5) | 24,503 (53.9) |        | -0.155 | 24,583 (54.1) | 24,503 (53.9) | -0.004 |
| Barthel index: Grooming                |                |               | <0.001 |        |               |               |        |
| 0                                      | 110,882 (42.4) | 23,286 (51.3) |        | 0.178  | 23,256 (51.2) | 23,285 (51.3) | 0.001  |
| 5                                      | 150,516 (57.6) | 22,142 (48.7) |        | -0.178 | 22,171 (48.8) | 22,142 (48.7) | -0.001 |
| Barthel index: Toilet Use              |                |               | <0.001 |        |               |               |        |
| 0                                      | 71,286 (27.3)  | 15,331 (33.7) |        | 0.141  | 15,384 (33.9) | 15,331 (33.7) | -0.002 |
| 5                                      | 56,527 (21.6)  | 11,076 (24.4) |        | 0.066  | 10,922 (24.0) | 11,075 (24.4) | 0.008  |
| 10                                     | 133,585 (51.1) | 19,021 (41.9) |        | -0.186 | 19,121 (42.1) | 19,021 (41.9) | -0.004 |
| Barthel index: Feeding                 |                |               | <0.001 |        |               |               |        |
| 0                                      | 47,291 (18.1)  | 9,613 (21.2)  |        | 0.077  | 9,683 (21.3)  | 9,613 (21.2)  | -0.004 |

|                         |                |               |        |        |               |               |        |
|-------------------------|----------------|---------------|--------|--------|---------------|---------------|--------|
| 5                       | 47,803 (18.3)  | 10,093 (22.2) |        | 0.098  | 10,024 (22.1) | 10,092 (22.2) | 0.004  |
| 10                      | 166,304 (63.6) | 25,722 (56.6) |        | -0.143 | 25,720 (56.6) | 25,722 (56.6) | <0.001 |
| Barthel index: Transfer |                |               | <0.001 |        |               |               |        |
| 0                       | 58,659 (22.4)  | 12,483 (27.5) |        | 0.117  | 12,504 (27.5) | 12,483 (27.5) | -0.001 |
| 5                       | 18,964 (7.3)   | 3,805 (8.4)   |        | 0.042  | 3,880 (8.5)   | 3,805 (8.4)   | -0.006 |
| 10                      | 56,794 (21.7)  | 11,264 (24.8) |        | 0.073  | 11,109 (24.5) | 11,263 (24.8) | 0.008  |
| 15                      | 126,981 (48.6) | 17,876 (39.4) |        | -0.187 | 17,934 (39.5) | 17,876 (39.4) | -0.003 |
| Barthel index: Mobility |                |               | <0.001 |        |               |               |        |
| 0                       | 83,895 (32.1)  | 18,091 (39.8) |        | 0.162  | 18,106 (39.9) | 18,090 (39.8) | -0.001 |
| 5                       | 20,694 (7.9)   | 3,567 (7.9)   |        | -0.002 | 3,594 (7.9)   | 3,567 (7.9)   | -0.002 |
| 10                      | 32,445 (12.4)  | 6,486 (14.3)  |        | 0.055  | 6,408 (14.1)  | 6,486 (14.3)  | 0.005  |
| 15                      | 124,364 (47.6) | 17,284 (38.0) |        | -0.193 | 17,319 (38.1) | 17,284 (38.0) | -0.002 |
| Barthel index: Dressing |                |               | <0.001 |        |               |               |        |
| 0                       | 68,851 (26.3)  | 14,712 (32.4) |        | 0.133  | 14,853 (32.7) | 14,712 (32.4) | -0.007 |
| 5                       | 64,340 (24.6)  | 12,532 (27.6) |        | 0.068  | 12,338 (27.2) | 12,531 (27.6) | 0.010  |
| 10                      | 128,207 (49.0) | 18,184 (40.0) |        | -0.182 | 18,236 (40.1) | 18,184 (40.0) | -0.002 |
| Barthel index: Stairs   |                |               | <0.001 |        |               |               |        |
| 0                       | 104,059 (39.8) | 22,099 (48.6) |        | 0.179  | 22,216 (48.9) | 22,098 (48.6) | -0.005 |
| 5                       | 41,527 (15.9)  | 7,544 (16.6)  |        | 0.020  | 7,387 (16.3)  | 7,544 (16.6)  | 0.009  |
| 10                      | 115,812 (44.3) | 15,785 (34.7) |        | -0.196 | 15,824 (34.8) | 15,785 (34.7) | -0.002 |
| Barthel index: Bathing  |                |               | <0.001 |        |               |               |        |
| 0                       | 138,671 (53.0) | 28,406 (62.5) |        | 0.193  | 28,405 (62.5) | 28,405 (62.5) | <0.001 |
| 5                       | 122,727 (47.0) | 17,022 (37.5) |        | -0.193 | 17,022 (37.5) | 17,022 (37.5) | <0.001 |

|                                                        |                |               |        |        |               |               |         |
|--------------------------------------------------------|----------------|---------------|--------|--------|---------------|---------------|---------|
| Japan Coma Scale                                       |                |               | <0.001 |        |               |               |         |
| 0                                                      | 236,146 (90.3) | 39,566 (87.1) |        | -0.103 | 39,580 (87.1) | 39,565 (87.1) | -0.001  |
| 1 digit                                                | 25,252 (9.7)   | 5,862 (12.9)  |        | 0.103  | 5,847 (12.9)  | 5,862 (12.9)  | 0.001   |
| Weekend Admission                                      | 42,777 (16.4)  | 7,459 (16.4)  | 0.770  | 0.001  | 7,383 (16.3)  | 7,459 (16.4)  | 0.005   |
| Medication within 2 days after admission               |                |               |        |        |               |               |         |
| Beta blocker                                           | 86,132 (33.0)  | 17,956 (39.5) | <0.001 | 0.137  | 17,904 (39.4) | 17,955 (39.5) | 0.002   |
| Renin-angiotensin system inhibitor                     | 95,746 (36.6)  | 18,765 (41.3) | <0.001 | 0.096  | 18,885 (41.6) | 18,764 (41.3) | -0.005  |
| Mineralocorticoid receptor antagonist                  | 82,847 (31.7)  | 16,356 (36.0) | <0.001 | 0.091  | 16,402 (36.1) | 16,355 (36.0) | -0.002  |
| Tolvaptan                                              | 26,576 (10.2)  | 6,818 (15.0)  | <0.001 | 0.146  | 6,870 (15.1)  | 6,817 (15.0)  | -0.003  |
| Intravenous inotropic agent                            | 42,124 (16.1)  | 6,093 (13.4)  | <0.001 | -0.076 | 6119 (13.5)   | 6,093 (13.4)  | -0.002  |
| Intravenous nitrate                                    | 49,210 (18.8)  | 9,374 (20.6)  | <0.001 | 0.045  | 9,423 (20.7)  | 9,374 (20.6)  | -0.003  |
| Intravenous furosemide                                 | 168,506 (64.5) | 30,182 (66.4) | <0.001 | 0.042  | 30,034 (66.1) | 30,181 (66.4) | 0.007   |
| Intravenous carperitide                                | 104,223 (39.9) | 18,000 (39.6) | 0.320  | -0.005 | 18,051 (39.7) | 18,000 (39.6) | -0.002  |
| Procedures within 2 days after admission               |                |               |        |        |               |               |         |
| Respiratory support                                    | 24,876 (9.5)   | 5,383 (11.8)  | <0.001 | 0.076  | 5,536 (12.2)  | 5,383 (11.8)  | -0.010  |
| Hemodialysis                                           | 4,697 (1.8)    | 464 (1.0)     | <0.001 | -0.066 | 456 (1.0)     | 464 (1.0)     | 0.002   |
| Intensive care unit stay within 2 days after admission | 22,749 (8.7)   | 4,652 (10.2)  | <0.001 | 0.053  | 4,658 (10.3)  | 4,652 (10.2)  | <-0.001 |
| Educational institute                                  | 206,886 (79.1) | 36,189 (79.7) | 0.012  | 0.013  | 35,989 (79.2) | 36,189 (79.7) | 0.011   |
| hospital volume                                        |                |               | <0.001 |        |               |               |         |
| Low                                                    | 89,376 (34.2)  | 12,753 (28.1) |        | -0.132 | 12,729 (28.0) | 12,753 (28.1) | 0.001   |
| Medium                                                 | 87,056 (33.3)  | 14,530 (32.0) |        | -0.028 | 14,566 (32.1) | 14,530 (32.0) | -0.002  |
| High                                                   | 84,966 (32.5)  | 18,145 (39.9) |        | 0.155  | 18,132 (39.9) | 18,144 (39.9) | 0.001   |
| Year of admission (year)                               |                |               | <0.001 |        |               |               |         |

|      |               |               |        |               |               |         |
|------|---------------|---------------|--------|---------------|---------------|---------|
| 2010 | 16,483 (6.3)  | 1,281 (2.8)   | -0.168 | 1,309 (2.9)   | 1,281 (2.8)   | -0.004  |
| 2011 | 37,489 (14.3) | 3,142 (6.9)   | -0.243 | 3,201 (7.0)   | 3,142 (6.9)   | -0.005  |
| 2012 | 40,485 (15.5) | 4,466 (9.8)   | -0.171 | 4,471 (9.8)   | 4,466 (9.8)   | <-0.001 |
| 2013 | 40,102 (15.3) | 5,220 (11.5)  | -0.113 | 5,125 (11.3)  | 5,220 (11.5)  | 0.007   |
| 2014 | 41,612 (15.9) | 7,701 (17.0)  | 0.028  | 7,674 (16.9)  | 7,701 (17.0)  | 0.002   |
| 2015 | 43,993 (16.8) | 10,670 (23.5) | 0.167  | 10,647 (23.4) | 10,670 (23.5) | 0.001   |
| 2016 | 24,177 (9.2)  | 7,041 (15.5)  | 0.191  | 7,092 (15.6)  | 7,040 (15.5)  | -0.003  |
| 2017 | 14,070 (5.4)  | 4,863 (10.7)  | 0.197  | 4,862 (10.7)  | 4,863 (10.7)  | <0.001  |
| 2018 | 2,987 (1.1)   | 1,044 (2.3)   | 0.089  | 1,046 (2.3)   | 1,044 (2.3)   | <-0.001 |

---

Data are expressed as means ( $\pm$  standard deviations) or numbers (percentages).

SMD, standardized mean difference

**Supplemental Table S2:** Characteristics of patients with and without early rehabilitation (within 3 days after hospital admission) before and after propensity score matching

|                                      | Before propensity score matching Rehabilitation within 3 days |                   | P-value | SMD    | After propensity score matching Rehabilitation within 3 days |                   | SMD    |
|--------------------------------------|---------------------------------------------------------------|-------------------|---------|--------|--------------------------------------------------------------|-------------------|--------|
|                                      | No<br>(n=242,181)                                             | Yes<br>(n=60,359) |         |        | No<br>(n=60,358)                                             | Yes<br>(n=60,358) |        |
| Age, years                           | 76 (±12)                                                      | 79 (±11)          | <0.001  | 0.258  | 79 (±11)                                                     | 79 (±11)          | 0.002  |
| Male sex                             | 136,292 (56.3)                                                | 30,670 (50.8)     | <0.001  | -0.110 | 30,692 (50.8)                                                | 30,670 (50.8)     | -0.001 |
| Body mass index (kg/m <sup>2</sup> ) |                                                               |                   | <0.001  |        |                                                              |                   |        |
| <18.5                                | 36,506 (15.1)                                                 | 10,881 (18.0)     |         | 0.080  | 10,840 (18.0)                                                | 10,880 (18.0)     | 0.002  |
| 18.5–24.9                            | 142,492 (58.8)                                                | 35,632 (59.0)     |         | 0.004  | 35,647 (59.1)                                                | 35,632 (59.0)     | -0.001 |
| 25.0–29.9                            | 48,203 (19.9)                                                 | 10,577 (17.5)     |         | -0.061 | 10,514 (17.4)                                                | 10,577 (17.5)     | 0.003  |
| ≥30.0                                | 14,980 (6.2)                                                  | 3,269 (5.4)       |         | -0.033 | 3,357 (5.6)                                                  | 3,269 (5.4)       | -0.006 |
| Comorbidity                          |                                                               |                   |         |        |                                                              |                   |        |
| Atrial fibrillation                  | 96,668 (39.9)                                                 | 25,560 (42.3)     | <0.001  | 0.049  | 25,357 (42.0)                                                | 25,560 (42.3)     | 0.007  |
| Hypertension                         | 164,439 (67.9)                                                | 41,732 (69.1)     | <0.001  | 0.027  | 41,919 (69.5)                                                | 41,731 (69.1)     | -0.007 |
| Diabetes mellitus                    | 78,486 (32.4)                                                 | 18,934 (31.4)     | <0.001  | -0.022 | 19,152 (31.7)                                                | 18,934 (31.4)     | -0.008 |
| Chronic renal failure                | 35,714 (14.7)                                                 | 8,822 (14.6)      | 0.420   | -0.004 | 8,784 (14.6)                                                 | 8,822 (14.6)      | 0.002  |
| Chronic liver disease                | 10,202 (4.2)                                                  | 2,182 (3.6)       | <0.001  | -0.031 | 2,242 (3.7)                                                  | 2,182 (3.6)       | -0.005 |
| Chronic respiratory disease          | 27,287 (11.3)                                                 | 7,493 (12.4)      | <0.001  | 0.036  | 7,491 (12.4)                                                 | 7,493 (12.4)      | <0.001 |
| Anemia                               | 36,979 (15.3)                                                 | 10,146 (16.8)     | <0.001  | 0.042  | 10,205 (16.9)                                                | 10,146 (16.8)     | -0.003 |
| Cancer                               | 14,809 (6.1)                                                  | 3,377 (5.6)       | <0.001  | -0.022 | 3,457 (5.7)                                                  | 3,377 (5.6)       | -0.006 |
| Myocardial infarction                | 6,121 (2.5)                                                   | 1,551 (2.6)       | 0.560   | 0.003  | 1,596 (2.6)                                                  | 1,551 (2.6)       | -0.005 |
| Dilated cardiomyopathy               | 20,975 (8.7)                                                  | 4,293 (7.1)       | <0.001  | -0.057 | 4,208 (7.0)                                                  | 4,293 (7.1)       | 0.006  |
| Smoking                              | 83,533 (34.5)                                                 | 19,462 (32.2)     | <0.001  | -0.048 | 19,530 (32.4)                                                | 19,462 (32.2)     | -0.002 |

|                                        |                |               |        |        |               |               |         |
|----------------------------------------|----------------|---------------|--------|--------|---------------|---------------|---------|
| Prior hospital admission               | 64,740 (26.7)  | 17,429 (28.9) | <0.001 | 0.048  | 17,569 (29.1) | 17,429 (28.9) | -0.005  |
| New York Heart Association             |                |               | 0.002  |        |               |               |         |
| Class II                               | 75,899 (31.3)  | 18,669 (30.9) |        | -0.009 | 18,667 (30.9) | 18,669 (30.9) | <0.001  |
| Class III                              | 94,710 (39.1)  | 23,407 (38.8) |        | -0.007 | 23,280 (38.6) | 23,406 (38.8) | 0.004   |
| Class IV                               | 71,572 (29.6)  | 18,283 (30.3) |        | 0.016  | 18,411 (30.5) | 18,283 (30.3) | -0.005  |
| Total Barthel Index score at admission | 62 (±39)       | 54 (±39)      | <0.001 | -0.211 | 54 (±39)      | 54 (±39)      | 0.001   |
| Barthel index: Bowels                  |                |               | <0.001 |        |               |               |         |
| 0                                      | 57,520 (23.8)  | 18,044 (29.9) |        | 0.139  | 18,163 (30.1) | 18,043 (29.9) | -0.004  |
| 5                                      | 31,456 (13.0)  | 9,178 (15.2)  |        | 0.064  | 9,057 (15.0)  | 9,178 (15.2)  | 0.006   |
| 10                                     | 153,205 (63.3) | 33,137 (54.9) |        | -0.171 | 33,138 (54.9) | 33,137 (54.9) | <-0.001 |
| Barthel index: Bladder                 |                |               | <0.001 |        |               |               |         |
| 0                                      | 61,032 (25.2)  | 19,047 (31.6) |        | 0.141  | 19,156 (31.7) | 19,046 (31.6) | -0.004  |
| 5                                      | 30,916 (12.8)  | 8,985 (14.9)  |        | 0.061  | 8,888 (14.7)  | 8,985 (14.9)  | 0.005   |
| 10                                     | 150,233 (62.0) | 32,327 (53.6) |        | -0.172 | 32,314 (53.5) | 32,327 (53.6) | <0.001  |
| Barthel index: Grooming                |                |               | <0.001 |        |               |               |         |
| 0                                      | 101,514 (41.9) | 31,099 (51.5) |        | 0.193  | 31,102 (51.5) | 31,098 (51.5) | <-0.001 |
| 5                                      | 140,667 (58.1) | 29,260 (48.5) |        | -0.193 | 29,256 (48.5) | 29,260 (48.5) | <0.001  |
| Barthel index: Toilet Use              |                |               | <0.001 |        |               |               |         |
| 0                                      | 64,878 (26.8)  | 20,712 (34.3) |        | 0.164  | 20,769 (34.4) | 20,711 (34.3) | -0.002  |
| 5                                      | 52,255 (21.6)  | 14,565 (24.1) |        | 0.061  | 14,446 (23.9) | 14,565 (24.1) | 0.005   |
| 10                                     | 125,048 (51.6) | 25,082 (41.6) |        | -0.203 | 25,143 (41.7) | 25,082 (41.6) | -0.002  |
| Barthel index: Feeding                 |                |               | <0.001 |        |               |               |         |
| 0                                      | 43,024 (17.8)  | 13,158 (21.8) |        | 0.101  | 13,272 (22.0) | 13,158 (21.8) | -0.005  |

|                         |                |               |        |        |               |               |         |
|-------------------------|----------------|---------------|--------|--------|---------------|---------------|---------|
| 5                       | 43,919 (18.1)  | 13,348 (22.1) |        | 0.099  | 13,238 (21.9) | 13,348 (22.1) | 0.004   |
| 10                      | 155,238 (64.1) | 33,853 (56.1) |        | -0.164 | 33,848 (56.1) | 33,852 (56.1) | <0.001  |
| Barthel index: Transfer |                |               | <0.001 |        |               |               |         |
| 0                       | 53,286 (22.0)  | 16,977 (28.1) |        | 0.142  | 17,029 (28.2) | 16,977 (28.1) | -0.002  |
| 5                       | 17,417 (7.2)   | 5,087 (8.4)   |        | 0.046  | 5,139 (8.5)   | 5,087 (8.4)   | -0.003  |
| 10                      | 52,551 (21.7)  | 14,758 (24.5) |        | 0.065  | 14,587 (24.2) | 14,757 (24.4) | 0.007   |
| 15                      | 118,927 (49.1) | 23,537 (39.0) |        | -0.205 | 23,603 (39.1) | 23,537 (39.0) | -0.002  |
| Barthel index: Mobility |                |               | <0.001 |        |               |               |         |
| 0                       | 76,413 (31.6)  | 24,370 (40.4) |        | 0.185  | 24,364 (40.4) | 24,369 (40.4) | <0.001  |
| 5                       | 19,300 (8.0)   | 4,696 (7.8)   |        | -0.007 | 4,684 (7.8)   | 4,696 (7.8)   | 0.001   |
| 10                      | 29,936 (12.4)  | 8,524 (14.1)  |        | 0.052  | 8,528 (14.1)  | 8,524 (14.1)  | <-0.001 |
| 15                      | 116,532 (48.1) | 22,769 (37.7) |        | -0.211 | 22,782 (37.7) | 22,769 (37.7) | <-0.001 |
| Barthel index: Dressing |                |               | <0.001 |        |               |               |         |
| 0                       | 62,675 (25.9)  | 19,873 (32.9) |        | 0.155  | 19,942 (33.0) | 19,872 (32.9) | -0.002  |
| 5                       | 59,475 (24.6)  | 16,541 (27.4) |        | 0.065  | 16,412 (27.2) | 16,541 (27.4) | 0.005   |
| 10                      | 120,031 (49.6) | 23,945 (39.7) |        | -0.200 | 24,004 (39.8) | 23,945 (39.7) | -0.002  |
| Barthel index: Stairs   |                |               | <0.001 |        |               |               |         |
| 0                       | 95,147 (39.3)  | 29,531 (48.9) |        | 0.195  | 29,509 (48.9) | 29,530 (48.9) | 0.001   |
| 5                       | 38,526 (15.9)  | 9,953 (16.5)  |        | 0.016  | 9,883 (16.4)  | 9,953 (16.5)  | 0.003   |
| 10                      | 108,508 (44.8) | 20,875 (34.6) |        | -0.210 | 20,966 (34.7) | 20,875 (34.6) | -0.003  |
| Barthel index: Bathing  |                |               | <0.001 |        |               |               |         |
| 0                       | 127,332 (52.6) | 37,809 (62.6) |        | 0.205  | 37,774 (62.6) | 37,808 (62.6) | 0.001   |
| 5                       | 114,849 (47.4) | 22,550 (37.4) |        | -0.205 | 22,584 (37.4) | 22,550 (37.4) | -0.001  |



|                                                        |                |               |        |        |               |               |        |
|--------------------------------------------------------|----------------|---------------|--------|--------|---------------|---------------|--------|
| Japan Coma Scale                                       |                |               | <0.001 |        |               |               |        |
| 0                                                      | 219,260 (90.5) | 52,645 (87.2) |        | -0.106 | 52,575 (87.1) | 52,644 (87.2) | 0.003  |
| 1 digit                                                | 22,921 (9.5)   | 7,714 (12.8)  |        | 0.106  | 7,783 (12.9)  | 7,714 (12.8)  | -0.003 |
| Weekend Admission                                      | 38,146 (15.8)  | 11,317 (18.7) | <0.001 | 0.079  | 11,346 (18.8) | 11,316 (18.7) | -0.001 |
| Medication within 2 days after admission               |                |               |        |        |               |               |        |
| Beta blocker                                           | 79,254 (32.7)  | 23,513 (39.0) | <0.001 | 0.130  | 23,509 (38.9) | 23,513 (39.0) | <0.001 |
| Renin-angiotensin system inhibitor                     | 88,472 (36.5)  | 24,785 (41.1) | <0.001 | 0.093  | 24,939 (41.3) | 24,784 (41.1) | -0.005 |
| Mineralocorticoid receptor antagonist                  | 76,727 (31.7)  | 21,393 (35.4) | <0.001 | 0.080  | 21,427 (35.5) | 21,393 (35.4) | -0.001 |
| Tolvaptan                                              | 24,247 (10.0)  | 8,764 (14.5)  | <0.001 | 0.138  | 8,812 (14.6)  | 8,763 (14.5)  | -0.002 |
| Intravenous inotropic agent                            | 39,340 (16.2)  | 8,273 (13.7)  | <0.001 | -0.071 | 8,190 (13.6)  | 8,273 (13.7)  | 0.004  |
| Intravenous nitrate                                    | 44,447 (18.4)  | 12,858 (21.3) | <0.001 | 0.074  | 12,902 (21.4) | 12,858 (21.3) | -0.002 |
| Intravenous furosemide                                 | 156,071 (64.4) | 40,709 (67.4) | <0.001 | 0.063  | 40,489 (67.1) | 40,709 (67.4) | 0.008  |
| Intravenous carperitide                                | 96,686 (39.9)  | 24,568 (40.7) | <0.001 | 0.016  | 24,646 (40.8) | 24,568 (40.7) | -0.003 |
| Procedures within 2 days after admission               |                |               |        |        |               |               |        |
| Respiratory support                                    | 22,555 (9.3)   | 7,358 (12.2)  | <0.001 | 0.093  | 7,454 (12.3)  | 7,358 (12.2)  | -0.005 |
| Hemodialysis                                           | 4,264 (1.8)    | 653 (1.1)     | <0.001 | -0.057 | 658 (1.1)     | 653 (1.1)     | -0.001 |
| Intensive care unit stay within 2 days after admission | 20,634 (8.5)   | 6,486 (10.7)  | <0.001 | 0.075  | 6,528 (10.8)  | 6,486 (10.7)  | -0.002 |
| Educational institute                                  | 191,353 (79.0) | 48,361 (80.1) | <0.001 | 0.028  | 48,129 (79.7) | 48,360 (80.1) | 0.010  |
| hospital volume                                        |                |               | <0.001 |        |               |               |        |
| Low                                                    | 83,436 (34.5)  | 16,992 (28.2) |        | -0.136 | 17,033 (28.2) | 16,992 (28.2) | -0.002 |
| Medium                                                 | 81,357 (33.6)  | 19,830 (32.9) |        | -0.016 | 19,924 (33.0) | 19,830 (32.9) | -0.003 |
| High                                                   | 77,388 (32.0)  | 23,537 (39.0) |        | 0.148  | 2,3401 (38.8) | 23,536 (39.0) | 0.005  |
| Year of admission (year)                               |                |               | <0.001 |        |               |               |        |

|      |               |               |        |               |               |        |
|------|---------------|---------------|--------|---------------|---------------|--------|
| 2010 | 15,786 (6.5)  | 1,755 (2.9)   | -0.171 | 1,751 (2.9)   | 1,755 (2.9)   | <0.001 |
| 2011 | 35,665 (14.7) | 4,363 (7.2)   | -0.242 | 4,445 (7.4)   | 4,363 (7.2)   | -0.005 |
| 2012 | 38,174 (15.8) | 6,135 (10.2)  | -0.167 | 6,079 (10.1)  | 6,135 (10.2)  | 0.003  |
| 2013 | 37,469 (15.5) | 7,213 (12.0)  | -0.103 | 7,186 (11.9)  | 7,213 (12.0)  | 0.001  |
| 2014 | 38,499 (15.9) | 10,146 (16.8) | 0.025  | 10,043 (16.6) | 10,146 (16.8) | 0.005  |
| 2015 | 39,937 (16.5) | 13,968 (23.1) | 0.167  | 13,909 (23.0) | 13,968 (23.1) | 0.002  |
| 2016 | 21,610 (8.9)  | 9,178 (15.2)  | 0.194  | 9,364 (15.5)  | 9,178 (15.2)  | -0.009 |
| 2017 | 12,430 (5.1)  | 6,241 (10.3)  | 0.196  | 6,215 (10.3)  | 6,240 (10.3)  | 0.001  |
| 2018 | 2,611 (1.1)   | 1,360 (2.3)   | 0.092  | 1,366 (2.3)   | 1,360 (2.3)   | -0.001 |

---

Data are expressed as means ( $\pm$  standard deviations) or numbers (percentages).

SMD, standardized mean difference

**Supplemental Table S3:** Characteristics of patients with and without early rehabilitation before and after inverse probability of treatment weighting (within 2 days after hospital admission)

|                                      | Before IPTWs weighted Rehabilitation<br>within 2 days |                   |        | After IPTWs weighted Rehabilitation<br>within 2 days |                   |         |
|--------------------------------------|-------------------------------------------------------|-------------------|--------|------------------------------------------------------|-------------------|---------|
|                                      | No<br>(n=261,398)                                     | Yes<br>(n=45,428) | SMD    | No<br>(n=261,398)                                    | Yes<br>(n=45,428) | SMD     |
| Age, years                           | 76 (±12)                                              | 79 (±11)          | 0.250  | 77 (±12)                                             | 77 (±12)          | -0.006  |
| Male sex                             | 56.0                                                  | 50.8              | -0.105 | 55.2                                                 | 55.2              | <-0.001 |
| Body mass index (kg/m <sup>2</sup> ) |                                                       |                   |        |                                                      |                   |         |
| <18.5                                | 15.2                                                  | 18.0              | 0.075  | 15.7                                                 | 15.8              | 0.003   |
| 18.5–24.9                            | 58.9                                                  | 59.0              | 0.003  | 58.9                                                 | 58.8              | -0.001  |
| 25.0–29.9                            | 19.8                                                  | 17.5              | -0.058 | 19.4                                                 | 19.3              | -0.004  |
| ≥30.0                                | 6.1                                                   | 5.4               | -0.029 | 6.0                                                  | 6.2               | 0.005   |
| Comorbidity                          |                                                       |                   |        |                                                      |                   |         |
| Atrial fibrillation                  | 39.9                                                  | 42.5              | 0.053  | 40.3                                                 | 39.9              | -0.008  |
| Hypertension                         | 67.9                                                  | 68.7              | 0.017  | 68.1                                                 | 68.0              | -0.001  |
| Diabetes mellitus                    | 32.3                                                  | 31.2              | -0.023 | 32.2                                                 | 32.5              | 0.008   |
| Chronic renal failure                | 14.8                                                  | 14.5              | -0.009 | 14.7                                                 | 14.6              | -0.003  |
| Chronic liver disease                | 4.2                                                   | 3.7               | -0.026 | 4.1                                                  | 4.1               | -0.001  |
| Chronic respiratory disease          | 11.3                                                  | 12.6              | 0.040  | 11.5                                                 | 11.6              | 0.004   |
| Anemia                               | 15.3                                                  | 16.6              | 0.036  | 15.5                                                 | 15.6              | 0.002   |
| Cancer                               | 6.1                                                   | 5.5               | -0.025 | 6.0                                                  | 5.8               | -0.007  |
| Myocardial infarction                | 2.5                                                   | 2.6               | 0.004  | 2.5                                                  | 2.7               | 0.007   |
| Dilated cardiomyopathy               | 8.6                                                   | 7.0               | -0.058 | 8.3                                                  | 8.4               | 0.002   |

|                                        |          |          |        |          |          |        |
|----------------------------------------|----------|----------|--------|----------|----------|--------|
| Smoking                                | 34.4     | 32.3     | -0.044 | 34.1     | 34.3     | 0.005  |
| Prior hospital admission               | 26.8     | 29.2     | 0.053  | 27.2     | 27.7     | 0.011  |
| New York Heart Association             |          |          |        |          |          |        |
| Class II                               | 31.4     | 31.6     | 0.004  | 31.4     | 31.3     | -0.002 |
| Class III                              | 39.0     | 38.6     | -0.008 | 38.9     | 38.6     | -0.007 |
| Class IV                               | 29.6     | 29.8     | 0.004  | 29.7     | 30.1     | 0.010  |
| Total Barthel Index score at admission | 62 (±39) | 54 (±39) | -0.188 | 61 (±39) | 60 (±39) | -0.007 |
| Barthel index: Bowels                  |          |          |        |          |          |        |
| 0                                      | 24.2     | 29.4     | 0.118  | 25.0     | 25.3     | 0.009  |
| 5                                      | 13.1     | 15.3     | 0.066  | 13.4     | 13.4     | 0.001  |
| 10                                     | 62.8     | 55.3     | -0.153 | 61.7     | 61.2     | -0.008 |
| Barthel index: Bladder                 |          |          |        |          |          |        |
| 0                                      | 25.6     | 31.0     | 0.120  | 26.4     | 26.7     | 0.007  |
| 5                                      | 12.8     | 15.0     | 0.064  | 13.2     | 13.2     | 0.003  |
| 10                                     | 61.5     | 53.9     | -0.155 | 60.4     | 60.0     | -0.008 |
| Barthel index: Grooming                |          |          |        |          |          |        |
| 0                                      | 42.4     | 51.3     | 0.178  | 43.7     | 44.0     | 0.005  |
| 5                                      | 57.6     | 48.7     | -0.178 | 56.3     | 56.0     | -0.005 |
| Barthel index: Toilet Use              |          |          |        |          |          |        |
| 0                                      | 27.3     | 33.7     | 0.141  | 28.3     | 28.5     | 0.005  |
| 5                                      | 21.6     | 24.4     | 0.066  | 22.0     | 21.9     | -0.003 |
| 10                                     | 51.1     | 41.9     | -0.186 | 49.7     | 49.6     | -0.002 |
| Barthel index: Feeding                 |          |          |        |          |          |        |
| 0                                      | 18.1     | 21.2     | 0.077  | 18.6     | 18.9     | 0.008  |

|                         |      |      |        |      |      |        |
|-------------------------|------|------|--------|------|------|--------|
| 5                       | 18.3 | 22.2 | 0.098  | 18.9 | 18.8 | -0.001 |
| 10                      | 63.6 | 56.6 | -0.143 | 62.6 | 62.3 | -0.006 |
| Barthel index: Transfer |      |      |        |      |      |        |
| 0                       | 22.4 | 27.5 | 0.117  | 23.2 | 23.3 | 0.003  |
| 5                       | 7.3  | 8.4  | 0.042  | 7.4  | 7.5  | 0.005  |
| 10                      | 21.7 | 24.8 | 0.073  | 22.2 | 22.0 | -0.003 |
| 15                      | 48.6 | 39.4 | -0.187 | 47.2 | 47.1 | -0.002 |
| Barthel index: Mobility |      |      |        |      |      |        |
| 0                       | 32.1 | 39.8 | 0.162  | 33.3 | 33.5 | 0.005  |
| 5                       | 7.9  | 7.9  | -0.002 | 7.9  | 7.9  | 0.001  |
| 10                      | 12.4 | 14.3 | 0.055  | 12.7 | 12.6 | -0.001 |
| 15                      | 47.6 | 38.0 | -0.193 | 46.2 | 45.9 | -0.005 |
| Barthel index: Dressing |      |      |        |      |      |        |
| 0                       | 26.3 | 32.4 | 0.133  | 27.3 | 27.5 | 0.005  |
| 5                       | 24.6 | 27.6 | 0.068  | 25.0 | 25.0 | -0.001 |
| 10                      | 49.0 | 40.0 | -0.182 | 47.7 | 47.5 | -0.003 |
| Barthel index: Stairs   |      |      |        |      |      |        |
| 0                       | 39.8 | 48.6 | 0.179  | 41.1 | 41.5 | 0.007  |
| 5                       | 15.9 | 16.6 | 0.020  | 16.0 | 15.9 | -0.002 |
| 10                      | 44.3 | 34.7 | -0.196 | 42.9 | 42.6 | -0.006 |
| Barthel index: Bathing  |      |      |        |      |      |        |
| 0                       | 53.0 | 62.5 | 0.193  | 54.5 | 54.8 | 0.007  |
| 5                       | 47.0 | 37.5 | -0.193 | 45.5 | 45.2 | -0.007 |
| Japan Coma Scale        |      |      |        |      |      |        |

|                                                        |      |      |        |      |      |        |
|--------------------------------------------------------|------|------|--------|------|------|--------|
| 0                                                      | 90.3 | 87.1 | -0.103 | 89.8 | 89.7 | -0.004 |
| 1 digit                                                | 9.7  | 12.9 | 0.103  | 10.2 | 10.3 | 0.004  |
| Weekend Admission                                      | 16.4 | 16.4 | 0.001  | 16.4 | 16.4 | 0.002  |
| Medication within 2 days after admission               |      |      |        |      |      |        |
| Beta blocker                                           | 33.0 | 39.5 | 0.137  | 33.9 | 34.2 | 0.005  |
| Renin-angiotensin system inhibitor                     | 36.6 | 41.3 | 0.096  | 37.3 | 37.2 | -0.003 |
| Mineralocorticoid receptor antagonist                  | 31.7 | 36.0 | 0.091  | 32.3 | 31.7 | -0.013 |
| Tolvaptan                                              | 10.2 | 15.0 | 0.146  | 10.9 | 10.9 | -0.001 |
| Intravenous inotropic agent                            | 16.1 | 13.4 | -0.076 | 15.7 | 15.5 | -0.007 |
| Intravenous nitrate                                    | 18.8 | 20.6 | 0.045  | 19.1 | 18.9 | -0.005 |
| Intravenous furosemide                                 | 64.5 | 66.4 | 0.042  | 64.7 | 63.7 | -0.022 |
| Intravenous carperitide                                | 39.9 | 39.6 | -0.005 | 39.9 | 40.2 | 0.008  |
| Procedures within 2 days after admission               |      |      |        |      |      |        |
| Respiratory support                                    | 9.5  | 11.8 | 0.076  | 9.9  | 10.3 | 0.013  |
| Hemodialysis                                           | 1.8  | 1.0  | -0.066 | 1.7  | 1.7  | 0.002  |
| Intensive care unit stay within 2 days after admission | 8.7  | 10.2 | 0.053  | 9.0  | 9.4  | 0.015  |
| Educational institute                                  | 79.1 | 79.7 | 0.013  | 79.2 | 78.6 | -0.016 |
| hospital volume                                        |      |      |        |      |      |        |
| Low                                                    | 34.2 | 28.1 | -0.132 | 33.3 | 33.7 | 0.009  |
| Medium                                                 | 33.3 | 32.0 | -0.028 | 33.1 | 33.2 | 0.003  |
| High                                                   | 32.5 | 39.9 | 0.155  | 33.6 | 33.1 | -0.011 |
| Year of admission (year)                               |      |      |        |      |      |        |
| 2010                                                   | 6.3  | 2.8  | -0.168 | 5.8  | 5.9  | 0.004  |

|      |      |      |        |      |      |         |
|------|------|------|--------|------|------|---------|
| 2011 | 14.3 | 6.9  | -0.243 | 13.2 | 13.4 | 0.004   |
| 2012 | 15.5 | 9.8  | -0.171 | 14.7 | 14.6 | <-0.001 |
| 2013 | 15.3 | 11.5 | -0.113 | 14.8 | 14.6 | -0.004  |
| 2014 | 15.9 | 17.0 | 0.028  | 16.1 | 16.0 | -0.001  |
| 2015 | 16.8 | 23.5 | 0.167  | 17.8 | 17.8 | -0.001  |
| 2016 | 9.2  | 15.5 | 0.191  | 10.2 | 10.2 | -0.001  |
| 2017 | 5.4  | 10.7 | 0.197  | 6.2  | 6.2  | 0.001   |
| 2018 | 1.1  | 2.3  | 0.089  | 1.3  | 1.3  | 0.002   |

---

Data are expressed as means ( $\pm$  standard deviations) or percentages.

IPTW, inverse probability of treatment weighting; SMD, standardized mean difference

**Supplemental Table S4:** Characteristics of patients with and without early rehabilitation before and after inverse probability of treatment weighting (within 3 days after hospital admission)

|                                      | Before IPTWs weighted Rehabilitation<br>within 3 days |                   | SMD    | After IPTWs weighted Rehabilitation<br>within 3 days |                   | SMD     |
|--------------------------------------|-------------------------------------------------------|-------------------|--------|------------------------------------------------------|-------------------|---------|
|                                      | No<br>(n=242,181)                                     | Yes<br>(n=60,359) |        | No<br>(n=242,181)                                    | Yes<br>(n=60,359) |         |
| Age, years                           | 76 (±12)                                              | 79 (±11)          | 0.258  | 77 (±12)                                             | 77 (±12)          | -0.006  |
| Male sex                             | 56.3                                                  | 50.8              | -0.110 | 55.2                                                 | 55.2              | <0.001  |
| Body mass index (kg/m <sup>2</sup> ) |                                                       |                   |        |                                                      |                   |         |
| <18.5                                | 15.1                                                  | 18.0              | 0.080  | 15.7                                                 | 15.8              | 0.003   |
| 18.5–24.9                            | 58.8                                                  | 59.0              | 0.004  | 58.9                                                 | 58.8              | -0.002  |
| 25.0–29.9                            | 19.9                                                  | 17.5              | -0.061 | 19.4                                                 | 19.3              | -0.002  |
| ≥30.0                                | 6.2                                                   | 5.4               | -0.033 | 6.0                                                  | 6.1               | 0.004   |
| Comorbidity                          |                                                       |                   |        |                                                      |                   |         |
| Atrial fibrillation                  | 39.9                                                  | 42.3              | 0.049  | 40.4                                                 | 40.0              | -0.009  |
| Hypertension                         | 67.9                                                  | 69.1              | 0.027  | 68.2                                                 | 68.0              | -0.003  |
| Diabetes mellitus                    | 32.4                                                  | 31.4              | -0.022 | 32.2                                                 | 32.5              | 0.006   |
| Chronic renal failure                | 14.7                                                  | 14.6              | -0.004 | 14.7                                                 | 14.7              | <-0.001 |
| Chronic liver disease                | 4.2                                                   | 3.6               | -0.031 | 4.1                                                  | 4.0               | -0.002  |
| Chronic respiratory disease          | 11.3                                                  | 12.4              | 0.036  | 11.5                                                 | 11.6              | 0.004   |
| Anemia                               | 15.3                                                  | 16.8              | 0.042  | 15.6                                                 | 15.6              | -0.001  |
| Cancer                               | 6.1                                                   | 5.6               | -0.022 | 6.0                                                  | 5.9               | -0.006  |
| Myocardial infarction                | 2.5                                                   | 2.6               | 0.003  | 2.5                                                  | 2.6               | 0.006   |
| Dilated cardiomyopathy               | 8.7                                                   | 7.1               | -0.057 | 8.4                                                  | 8.4               | 0.002   |



|                                        |          |          |        |          |          |         |
|----------------------------------------|----------|----------|--------|----------|----------|---------|
| Smoking                                | 34.5     | 32.2     | -0.048 | 34.1     | 34.2     | 0.004   |
| Prior hospital admission               | 26.7     | 28.9     | 0.048  | 27.2     | 27.5     | 0.008   |
| New York Heart Association             |          |          |        |          |          |         |
| Class II                               | 31.3     | 30.9     | -0.009 | 31.2     | 31.2     | -0.002  |
| Class III                              | 39.1     | 38.8     | -0.007 | 39.0     | 38.7     | -0.007  |
| Class IV                               | 29.6     | 30.3     | 0.016  | 29.7     | 30.2     | 0.010   |
| Total Barthel Index score at admission | 62 (±39) | 54 (±39) | -0.211 | 61 (±39) | 60 (±39) | -0.007  |
| Barthel index: Bowels                  |          |          |        |          |          |         |
| 0                                      | 23.8     | 29.9     | 0.139  | 25.0     | 25.4     | 0.008   |
| 5                                      | 13.0     | 15.2     | 0.064  | 13.4     | 13.4     | <-0.001 |
| 10                                     | 63.3     | 54.9     | -0.171 | 61.6     | 61.2     | -0.007  |
| Barthel index: Bladder                 |          |          |        |          |          |         |
| 0                                      | 25.2     | 31.6     | 0.141  | 26.5     | 26.8     | 0.006   |
| 5                                      | 12.8     | 14.9     | 0.061  | 13.2     | 13.2     | 0.001   |
| 10                                     | 62.0     | 53.6     | -0.172 | 60.3     | 60.0     | -0.007  |
| Barthel index: Grooming                |          |          |        |          |          |         |
| 0                                      | 41.9     | 51.5     | 0.193  | 43.9     | 44.1     | 0.006   |
| 5                                      | 58.1     | 48.5     | -0.193 | 56.1     | 55.9     | -0.006  |
| Barthel index: Toilet Use              |          |          |        |          |          |         |
| 0                                      | 26.8     | 34.3     | 0.164  | 28.3     | 28.6     | 0.005   |
| 5                                      | 21.6     | 24.1     | 0.061  | 22.1     | 22.0     | -0.002  |
| 10                                     | 51.6     | 41.6     | -0.203 | 49.6     | 49.4     | -0.003  |
| Barthel index: Feeding                 |          |          |        |          |          |         |

|                         |      |      |        |      |      |         |
|-------------------------|------|------|--------|------|------|---------|
| 0                       | 17.8 | 21.8 | 0.101  | 18.6 | 18.9 | 0.008   |
| 5                       | 18.1 | 22.1 | 0.099  | 18.9 | 18.9 | -0.001  |
| 10                      | 64.1 | 56.1 | -0.164 | 62.5 | 62.2 | -0.005  |
| Barthel index: Transfer |      |      |        |      |      |         |
| 0                       | 22.0 | 28.1 | 0.142  | 23.3 | 23.4 | 0.004   |
| 5                       | 7.2  | 8.4  | 0.046  | 7.4  | 7.6  | 0.004   |
| 10                      | 21.7 | 24.5 | 0.065  | 22.2 | 22.1 | -0.003  |
| 15                      | 49.1 | 39.0 | -0.205 | 47.1 | 46.9 | -0.002  |
| Barthel index: Mobility |      |      |        |      |      |         |
| 0                       | 31.6 | 40.4 | 0.185  | 33.4 | 33.6 | 0.006   |
| 5                       | 8.0  | 7.8  | -0.007 | 7.9  | 7.9  | <-0.001 |
| 10                      | 12.4 | 14.1 | 0.052  | 12.7 | 12.6 | -0.002  |
| 15                      | 48.1 | 37.7 | -0.211 | 46.0 | 45.8 | -0.005  |
| Barthel index: Dressing |      |      |        |      |      |         |
| 0                       | 25.9 | 32.9 | 0.155  | 27.3 | 27.6 | 0.006   |
| 5                       | 24.6 | 27.4 | 0.065  | 25.1 | 25.0 | -0.002  |
| 10                      | 49.6 | 39.7 | -0.200 | 47.6 | 47.4 | -0.004  |
| Barthel index: Stairs   |      |      |        |      |      |         |
| 0                       | 39.3 | 48.9 | 0.195  | 41.3 | 41.6 | 0.007   |
| 5                       | 15.9 | 16.5 | 0.016  | 16.0 | 15.9 | -0.002  |
| 10                      | 44.8 | 34.6 | -0.210 | 42.7 | 42.5 | -0.005  |
| Barthel index: Bathing  |      |      |        |      |      |         |
| 0                       | 52.6 | 62.6 | 0.205  | 54.6 | 54.9 | 0.006   |

|                                                        |      |      |        |      |      |        |
|--------------------------------------------------------|------|------|--------|------|------|--------|
| 5                                                      | 47.4 | 37.4 | -0.205 | 45.4 | 45.1 | -0.006 |
| Japan Coma Scale                                       |      |      |        |      |      |        |
| 0                                                      | 90.5 | 87.2 | -0.106 | 89.9 | 89.7 | -0.004 |
| 1 digit                                                | 9.5  | 12.8 | 0.106  | 10.1 | 10.3 | 0.004  |
| Weekend Admission                                      | 15.8 | 18.7 | 0.079  | 16.4 | 16.4 | 0.002  |
| Medication within 2 days after admission               |      |      |        |      |      |        |
| Beta blocker                                           | 32.7 | 39.0 | 0.130  | 34.0 | 34.1 | 0.003  |
| Renin-angiotensin system inhibitor                     | 36.5 | 41.1 | 0.093  | 37.4 | 37.3 | -0.002 |
| Mineralocorticoid receptor antagonist                  | 31.7 | 35.4 | 0.080  | 32.4 | 31.9 | -0.010 |
| Tolvaptan                                              | 10.0 | 14.5 | 0.138  | 10.9 | 10.9 | -0.002 |
| Intravenous inotropic agent                            | 16.2 | 13.7 | -0.071 | 15.7 | 15.6 | -0.004 |
| Intravenous nitrate                                    | 18.4 | 21.3 | 0.074  | 18.9 | 18.8 | -0.002 |
| Intravenous furosemide                                 | 64.4 | 67.4 | 0.063  | 65.0 | 64.1 | -0.018 |
| Intravenous carperitide                                | 39.9 | 40.7 | 0.016  | 40.1 | 40.5 | 0.007  |
| Procedures within 2 days after admission               |      |      |        |      |      |        |
| Respiratory support                                    | 9.3  | 12.2 | 0.093  | 9.9  | 10.3 | 0.013  |
| Hemodialysis                                           | 1.8  | 1.1  | -0.057 | 1.6  | 1.7  | 0.004  |
| Intensive care unit stay within 2 days after admission | 8.5  | 10.7 | 0.075  | 9.0  | 9.3  | 0.011  |
| Educational institute                                  | 79.0 | 80.1 | 0.028  | 79.2 | 78.7 | -0.013 |
| hospital volume                                        |      |      |        |      |      |        |
| Low                                                    | 34.5 | 28.2 | -0.136 | 33.2 | 33.6 | 0.009  |
| Medium                                                 | 33.6 | 32.9 | -0.016 | 33.4 | 33.5 | 0.001  |
| High                                                   | 32.0 | 39.0 | 0.148  | 33.3 | 32.9 | -0.010 |

| Year of admission (year) |      |      |        |      |      |        |
|--------------------------|------|------|--------|------|------|--------|
| 2010                     | 6.5  | 2.9  | -0.171 | 5.8  | 5.9  | 0.003  |
| 2011                     | 14.7 | 7.2  | -0.242 | 13.2 | 13.3 | 0.002  |
| 2012                     | 15.8 | 10.2 | -0.167 | 14.6 | 14.6 | -0.001 |
| 2013                     | 15.5 | 12.0 | -0.103 | 14.8 | 14.7 | -0.001 |
| 2014                     | 15.9 | 16.8 | 0.025  | 16.1 | 16.0 | -0.002 |
| 2015                     | 16.5 | 23.1 | 0.167  | 17.8 | 17.8 | <0.001 |
| 2016                     | 8.9  | 15.2 | 0.194  | 10.2 | 10.2 | -0.001 |
| 2017                     | 5.1  | 10.3 | 0.196  | 6.2  | 6.2  | <0.001 |
| 2018                     | 1.1  | 2.3  | 0.092  | 1.3  | 1.3  | 0.001  |

---

Data are expressed as means ( $\pm$  standard deviations) or percentages.

IPTW, inverse probability of treatment weighting; SMD, standardized mean difference
